# Supplementary material for: Perceptions of hospitalized patients and their surrogate decision makers on dialysis initiation: a pilot study
Source: Springer Nature journal article supplement (doi:10.1186/s12882-018-0987-1), 2018-08-08
Supplement: MOESM2 [file 16021032]

Table S1

| study ID number | For the past 3 to 4 days, what has been the most important decision you have had to make (for your relative/friend)? | Describe your feelings about dialysis and the way in which it was started                        | Can you summarize what you know about dialysis?                                                                                           | What is your understanding of why you (your relative/friend) need(s) dialysis?                         | What alternatives to dialysis do you have?                                     | What feedback do you have for the nephrologists (kidney doctors)?                                      |
|-----------------|----------------------------------------------------------------------------------------------------------------------|--------------------------------------------------------------------------------------------------|-------------------------------------------------------------------------------------------------------------------------------------------|--------------------------------------------------------------------------------------------------------|--------------------------------------------------------------------------------|--------------------------------------------------------------------------------------------------------|
| 17              | How we are going to proceed about dialysis                                                                           | A little bit of apathy                                                                           | It's going to clean out my blood                                                                                                          | Because my blood is becoming toxic                                                                     | None                                                                           | Do a good job. It took a while to discover what was wrong.                                             |
| 15              | I had to get my leg looked at...it's important for me to know what is wrong with it                                  | I feel complete                                                                                  | It's supposed to help make me better                                                                                                      | Because they want me to live                                                                           | I don't                                                                        | You need more like Wasserstein. He's compassionate.                                                    |
| 40              | The DNR decision                                                                                                     | I had no idea about how it works. It's scary to me. The discussion made me understand it better. | It's going to cleanse his body.                                                                                                           | Because things are moving. He is not able to urinate.                                                  | We weren't given any.                                                          | I like the way a doctor sat here for 10 minutes and spoke to me. This one doctor broke it down for me. |
| 38              | Calling 911 to bring him to the hospital                                                                             | Grateful.                                                                                        | Filters the toxins out of the blood.                                                                                                      | Because the leukema cells break down and deposit crap and mess up the kidneys.                         | There are none.                                                                | I don't recall any discussion about risk.                                                              |
| 44              | Dialysis.                                                                                                            | Happy because the toxins would be removed. And glad.                                             | It purifies the blood.                                                                                                                    | To remove toxins - kidneys were weak.                                                                  | None                                                                           | Great as a team. Provide good service. Explain things well.                                            |
| 42              | Dialysis.                                                                                                            | Concerned.                                                                                       | A system used to clean the blood and rest the kidneys and to draw fluid.                                                                  | He needs to have blood cleaning to reduce BUN and creatinine levels. Also, he needs to draw off fluid. | Could have waited and done nothing and see if his kidneys would have woken up. | I'm appreciative of explanations.                                                                      |
| 13              | I've had no decisions decisions to make, honestly. My only kidney is coming out. I need this.                        | I didn't have any pain whatsoever. Perfectly fine.                                               | It purifies the blood and puts it back into the body. Because the kidneys can't do it anymore.                                            | Because I'll have no kidneys.                                                                          | There is no alternative.                                                       | I don't know. I love being here. Everybody is so nice.                                                 |
| 7               | I don't know.                                                                                                        | Scared.                                                                                          | A machine filters my blood because my kidneys cannot.                                                                                     | Because my kidneys are ruined.                                                                         | None                                                                           | Happy with my care.                                                                                    |
| 11              | My relationship with God.                                                                                            | Pleased and slightly puzzled.                                                                    | Is a process of removing toxins and wastes and other substances from the body and hopefully replacing them with other cleaner substances. | Because I keep accumulalating lots of negative chemicals.                                              | None, now.                                                                     | Continue to study!                                                                                     |
| 9               | Having the Swan [ganz catheter] put in.                                                                              | Good.                                                                                            | Cleaning my blood. It's my only option.                                                                                                   | My kidney function is bad.                                                                             | None                                                                           | They're all good.                                                                                      |

|    |                                                                                                                                                |                                                                                                                                                                                                                 |                                                                                                                                                                    |                                                                                                                                                                                        |                                                                                          |                                                                                                                                                                                                                                                                                                      |
|----|------------------------------------------------------------------------------------------------------------------------------------------------|-----------------------------------------------------------------------------------------------------------------------------------------------------------------------------------------------------------------|--------------------------------------------------------------------------------------------------------------------------------------------------------------------|----------------------------------------------------------------------------------------------------------------------------------------------------------------------------------------|------------------------------------------------------------------------------------------|------------------------------------------------------------------------------------------------------------------------------------------------------------------------------------------------------------------------------------------------------------------------------------------------------|
| 30 | Bringing him to the hospital.                                                                                                                  | Necessary.                                                                                                                                                                                                      | A process to remove toxins from the blood when the kidneys are unable to do so on their own.                                                                       | He was in metabolic acidosis and was acidemic with an elevated lactic acid and had ATN. Removal of toxic acids was necessary because he had ATN from sepsis.                           | None - death.                                                                            | They were kind.                                                                                                                                                                                                                                                                                      |
| 24 | The idea that I had to shut down my mothers body and let machines heal her.                                                                    | Very mixed. Result was wonderful, but [in] hindsight I feel more thought should have been given.                                                                                                                | It's like a washing machine. Filtering and purifying the blod. Getting rid of the toxins.                                                                          | Because her kidneys are shut down.                                                                                                                                                     | There were none.                                                                         | The machines that are provided are antiquated. The machines were breaking down - they're not up to date. Nurses were getting very frustrated. I spoke to 2 different kidney [doctors] on the weekends. I wonder if someone has seen a kidney doctor - would they look that up? She sees Dr. Rudnick. |
| 22 | I would probably say the dialysis, but it's hard to say because I've been asked to give consent for 3 to 4 things which they haven't done yet. | I had a negative connotation about it because the other hospital seemed like they were mismanaging him. So I thought it was an extreme thing.                                                                   | Machine takes your blood out, cleans it, filters it, and puts it back into your body.                                                                              | Because the extreme drops in his BP let his kidneys go into shock. Being defibrillated also caused his kidneys to go into shock. And he isn't getting fluid off in a good enough rate. | None. Lasix and other meds weren't working.                                              | I don't have enough data right now so I don't have any feedback. But nothing negative. When they did consent on the telephone it was very thorough.                                                                                                                                                  |
| 5  | Where I was going to start my regular dialysis after I left the hospital.                                                                      | I have no issues with the way it was started. It sucks, but if I want to live I have to go to dialysis.                                                                                                         | My kidneys aren't functioning so what dialysis does is it basically purifies the impurities in my blood. The machine takes it out, cleans it, and puts it back in. | Because my kidneys aren't functioning.                                                                                                                                                 | We've spoken about transplant. There's HD and PD. There's basically 2 choices. Or death. | I don't have any negative feedback. No problems with Dr. Denker either.                                                                                                                                                                                                                              |
| 20 | I believe that all the procedures that have been recommended [multiple abdominal surgeries] are important. The whole process altogether.       | At first I thought it was going to be a typical session (3 times per week) but the doctor said we'd do it gently. [I'm] at ease where the staff are so proactive. The hospital is renowned. [I] feel fortunate. | A process where they clean the blood and remove toxins when the kidneys can't.                                                                                     | Because he's on medication that is affecting his BP and blood flow is limited to his vital organs. He was receiving chemo and got sepsis...had trouble breathing...low BP...           | None                                                                                     | No input in regards to how to better/improve anything. Very respectful. Had not seen one before.                                                                                                                                                                                                     |

|    |                                                                                                               |                                                                                                                                               |                                                                                                                                             |                                                                                                      |                                                                                         |                                                                                                                                                        |
|----|---------------------------------------------------------------------------------------------------------------|-----------------------------------------------------------------------------------------------------------------------------------------------|---------------------------------------------------------------------------------------------------------------------------------------------|------------------------------------------------------------------------------------------------------|-----------------------------------------------------------------------------------------|--------------------------------------------------------------------------------------------------------------------------------------------------------|
| 18 | I've not made any important decisions. I've listened to the doctors and their advice was sound.               | I think it's lifesaving.                                                                                                                      | Correct his fluid overload and hopefully maintain his electrolytes and rest his kidneys.                                                    | Het's got ATN - acute renal failure.                                                                 | We've been waiting...72 hours...[he's] not recovering...diuretics...                    | No feedback. [I'm] very appreciative.                                                                                                                  |
| 14 | Consent for the first surgery [subdural evacuation].                                                          | I know it's necessary but I'm disappointed. We thought we'd be going directly to transplant and we're afraid he'll be on it until transplant. | Process where toxins are washed from the blood and blood is returned to the body.                                                           | He had 25 plus years of high BP medicines and other medicines that have ruined his kidney functions. | He has been on a sodium-free diet. Transplant is our goal. We have six donors lined up. | To be gentful when you explain that kidney damage doesn't get better. That was difficult.                                                              |
| 10 | I think the only one in the last 3 to 4 days was the dialysis decision.                                       | First of all I was worried. Didn't know a lot about [it]. Unsure of implications of it.                                                       | Exchange of blood - to clear out detrimental products...almost like cleaning it. I understand it's hard on the patient.                     | The content of his blood was not what the medical profession wanted to see.                          | I don't know                                                                            | Haven't been here to talk to them personally. Sometimes they talk too fast. Not particular to one person. The nurses take a lot of tim to talk to you. |
| 3  | Dialysis.                                                                                                     | It something that had to be done.                                                                                                             | I thought it was a good experience. I don't know a whole lot about tit. It helps clean the liver.                                           | To keep me healthy.                                                                                  | Dying.                                                                                  | None.                                                                                                                                                  |
| 8  | I don't know.                                                                                                 | I wish he didn't have to have it. If it's necessary it has to be done.                                                                        | ...is that a line has to be put in and that blood has to be taken out for purification [for] the kidney in order for it to function better. | So that he can live.                                                                                 | At this stage there is no other alternative.                                            | I don't know.                                                                                                                                          |
| 2  | At one point they asked about "pulling [the] plug." Conitnuing ICU treatment...[that was] the most important. | Necessary. Without it we'd have to pull the plug.                                                                                             | Used for when kidneys aren't working. Cleans toxins...takes over for kidneys.                                                               | Toxins building up.                                                                                  | Tough one...Don't know.                                                                 | [They] explained everything very well. Helped me make the right decision.                                                                              |

|  |  |  | <b>LEGEND FOR COLUMN COLORS</b>                                                             |                                                                                                        |                                                                                                   |                                                                                |
|--|--|--|---------------------------------------------------------------------------------------------|--------------------------------------------------------------------------------------------------------|---------------------------------------------------------------------------------------------------|--------------------------------------------------------------------------------|
|  |  |  | denotes that participant mentioned toxin removal, cleaning, purification, or volume removal | denotes that participant mentioned accumulation of toxins or fluid as a reason for dialysis initiation | denotes responses that qualified as unaware or unable to identify alternatives (aside from death) | denotes a feeling of appreciation or gratitude towards renal physician or team |
|  |  |  |                                                                                             |                                                                                                        | denotes responses that qualified as aware of transplant or another modality                       |                                                                                |
|  |  |  |                                                                                             |                                                                                                        | denotes responses that qualified as waiting longer for renal recovery                             |                                                                                |
